# Supplementary material for: The Mechanism of Onychomadesis (Nail Shedding) and Beau’s Lines Following Hand-Foot-Mouth Disease
Source: PubMed Central journal article supplement (PMC6630444; doi:10.3390/v11060522), 2019-06-06
Supplement: viruses-11-00522-s001.pdf [file viruses-11-00522-s001.pdf]

**Title: Partial sequence of VP1 and 5'UTR for some isolates:**

>TW/910142/2015 [organism=Enterovirus] [isolate=coxsackievirus A6] Human  
coxsackievirus A6 strain VP1 gene, partial CDS

```
TACCAATGGCAGACCGCTACCAACCCGTCAATATTCGCAAATTAAGCGATCCACCCCCTCAG
GTGTCTGTCCCGTTTATGTCACCAGCAACAGCCTATCAGTGGTTTTATGATGGTTACCCTACATT
TGGTGAGCACAACAAGCCACTAATTTACAGTATGGACAGTGCCCTAACAAACATGATGGGCCA
TTTTGCCATCCGAACAGTCAGTGAATCTACCACCGGGAAAAATGTCCACGTTCCGGGTGTACAT
GAGAATTAAGCACGTGAGAGCTTGGGTACCTAGACCCCTTCGGTCCCAAGCGTATATGGTCAA
GAATTACCCGACATATAGCCAAACAATAACTAACACTGCAACCGATCGTGCAAGCATAAC
```

>TW/910141/2015 [organism=Enterovirus] [isolate=coxsackievirus A6] Human  
coxsackievirus A6 strain VP1 gene, partial CDS

```
TACCAATGGCAGACCGCTACCAACCCGTCAATATTCGCAAATTAAGCGATCCACCCCCTCAG
GTGTCTGTCCCGTTTATGTCACCAGCAACAGCCTATCAGTGGTTTTATGATGGTTACCCTACATT
TGGTGAGCACAACAAGCCACTAATTTACAGTATGGACAGTGCCCTAACAAACATGATGGGCCA
TTTTGCCATCCGAACAGTCAGTGAATCTACCACCGGGAAAAATGTCCACGTTCCGGGTGTACAT
GAGAATTAAGCACGTGAGAGCTTGGGTACCTAGACCCCTTCGGTCCCAAGCGTATATGGTCAA
GAATTACCCGACATATAGCCAAACAATAACTAACACTGCAACCGATCGTGCAAGCATAAC
```

>TW/913268/2016 [organism=Enterovirus] [isolate=echovirus 30] Human Echovirus  
E30 strain 5' UTR

```
ACTTCGAGAACTTAGTACCACCATGAAAGTTGCGCAGCGTTTCGCTCCGCACGACCCCAGT
GTAGATCAGGCTGATGAGTCACCgCGTTCCTCACGGGTGACCGTGGCGGTGGCTGCGTTGGC
GGCCTGCCCTTGGGGCAACCCAAGGGACGCTTCAATACTGACATGGTGCGAAGAGTCTATTG
AGCTAATTGGTAGTCTCCGGCCCTGAATGCGGCTAATCCCAACTGCGGAGCAGATACCCAC
ATACCAGTGGGCAGTCTGTCGTAATGGGCAACTCTGCAGCGGAACCGACTACTTTGGGTGTC
CGTGTTC
```
